# Supplementary material
Source: PubMed Central journal article supplement (PMC9839337)
Supplement: NIHMS1809060-supplement-010502_-_Supplemental_Material.pdf [file NIHMS1809060-supplement-010502_-_Supplemental_Material.pdf]

## SUPPLEMENTAL MATERIALS

**Supplementary Table I. Patient Characteristics: PV Isolation versus PV Reconnection Following Stage 1**

### Epicardial Ablation

| All Patients<br>n = 64                 | PV Isolation<br>n = 46 | PV Reconnection<br>n = 18 | p-value     |
|----------------------------------------|------------------------|---------------------------|-------------|
| Age (year)                             | 65.5 ± 9.0             | 66.9 ± 12.7               | 0.64        |
| Female sex                             | 9 (19.6%)              | 3 (16.7%)                 | 1.00        |
| Presence of ERAF                       | 27 (58.7%)             | 9 (50.0%)                 | 0.53        |
| Race                                   |                        |                           | <b>0.04</b> |
| White                                  | 39 (84.8%)             | 11 (61.1%)                |             |
| Non-white                              | 7 (15.2%)              | 7 (38.9%)                 |             |
| BMI kg/m <sup>2</sup>                  | 32.5 ± 6.8             | 29.8 ± 4.8                | 0.13        |
| Hemoglobin A1c                         | 5.5 [5.3, 6.1]         | 5.7 [5.4, 5.8]            | 0.94        |
| Creatinine                             | 1.0 ± 0.24             | 1.1 ± 0.28                | 0.13        |
| CHA <sub>2</sub> DS <sub>2</sub> -VASc | 2 [2, 4]               | 3 [2, 4]                  | 0.37        |
| <b>Arrhythmia Type</b>                 |                        |                           | 0.95        |
| Paroxysmal                             | 6 (13.3%)              | 2 (11.1%)                 |             |
| Persistent                             | 11 (24.4%)             | 5 (27.8%)                 |             |
| Long Standing Persistent               | 28 (62.2%)             | 11 (61.1%)                |             |
| Previous Catheter Ablation             | 22 (47.8%)             | 4 (22.2%)                 | 0.09        |
| <b>Comorbidities</b>                   |                        |                           |             |
| Cerebral Vascular Accident             | 1 (2.3%)               | 1 (5.6%)                  | 0.50        |

|                          |            |            |      |
|--------------------------|------------|------------|------|
| Chronic Renal Disease    | 37 (80.4%) | 17 (94.4%) | 0.26 |
| Congestive Heart Failure | 29 (63.05) | 10 (55.6%) | 0.78 |
| Coronary Artery Disease  | 7 (15.6%)  | 7 (38.9%)  | 0.09 |
| Diabetes Mellitus        | 7 (15.9%)  | 1 (6.7%)   | 0.66 |
| Hypertension             | 32 (69.6%) | 13 (72.2%) | 1.00 |
| Obstructive Sleep Apnea  | 22 (48.9%) | 6 (33.3%)  | 0.40 |
| Tobacco Use              | 16 (37.2%) | 8 (44.4%)  | 0.77 |

**Pre-operative Echocardiogram**

|                                      |                   |                   |      |
|--------------------------------------|-------------------|-------------------|------|
| LV Ejection Fraction (%)             | 51.3 ± 10.8       | 52.3 ± 14.7       | 0.78 |
| LA Volume (mL)                       | 87.7 ± 31.0       | 91.1 ± 30.3       | 0.71 |
| LA Volume Index (mL/m <sup>2</sup> ) | 38.2 [30.7, 50.8] | 37.3 [32.3, 53.4] | 0.96 |

---

Table represents n (%), median [Q1, Q3] or mean (±SD); PV indicates pulmonary vein; ERAF, early recurrence of atrial fibrillation; BMI, body mass index; LV, left ventricle; and LA indicates left atrial.

**Supplementary Table II. Patient Characteristics for Patient with PW Isolation versus PW Reconnection Following Stage 1 Epicardial Ablation**

| <b>All Patients</b>                    | <b>PW Isolation</b> | <b>PW Reconnection</b> | <b>p-value</b> |
|----------------------------------------|---------------------|------------------------|----------------|
| n = 64                                 | n = 26              | n = 38                 |                |
| Age (year)                             | 65.5 ± 8.6          | 66.1 ± 11.1            | 0.81           |
| Female sex                             | 5 (19.2%)           | 7 (18.4%)              | 1.0            |
| Presence of ERAF                       | 14 (53.8%)          | 22 (57.9%)             | 0.75           |
| Race                                   |                     |                        | 0.84           |
| White                                  | 20 (76.9%)          | 30 (78.9%)             |                |
| Non-white                              | 6 (23.1%)           | 8 (21.1%)              |                |
| BMI kg/m <sup>2</sup>                  | 31.6 ± 4.3          | 31.9 ± 7.6             | 0.86           |
| Hemoglobin A1c                         | 5.6 [5.3, 6.0]      | 5.5 [5.4, 5.8]         | 0.96           |
| Creatinine                             | 1.0 ± 0.3           | 1.0 ± 0.3              | 0.92           |
| CHA <sub>2</sub> DS <sub>2</sub> -VASc | 2.5 [2, 4]          | 3 [2, 4]               | 0.76           |
| <b>Arrhythmia Type</b>                 |                     |                        |                |
| Paroxysmal                             | 3 (11.5%)           | 5 (13.5%)              | 0.613          |
| Persistent                             | 5 (19.2%)           | 11 (29.7%)             | 0.57           |
| Long Standing Persistent               | 18 (69.2%)          | 21 (56.8%)             | 0.48           |
| Previous Catheter Ablation             | 15 (57.7%)          | 11 (28.9%)             | <b>0.04</b>    |
| <b>Comorbidities</b>                   |                     |                        |                |
| Cerebral Vascular Accident             | 0                   | 2 (5.4%)               | 0.51           |
| Chronic Renal Disease                  | 23 (88.5%)          | 31 (81.7%)             | 0.51           |
| Congestive Heart Failure               | 14 (53.8%)          | 25 (65.8%)             | 0.44           |
| Coronary Artery Disease                | 4 (15.4%)           | 10 (27.0%)             | 0.27           |

|                         |            |            |      |
|-------------------------|------------|------------|------|
| Diabetes Mellitus       | 4 (16.0%)  | 4 (11.8%)  | 0.71 |
| Hypertension            | 18 (69.2%) | 27 (71.1%) | 1.00 |
| Obstructive Sleep Apnea | 11 (42.3%) | 17 (45.9%) | 0.80 |
| Tobacco Use             | 7 (28.0%)  | 17 (47.2%) | 0.18 |

**Pre-operative Echocardiogram**

|                                      |                   |                   |      |
|--------------------------------------|-------------------|-------------------|------|
| LV Ejection Fraction (%)             | 50.9 ± 11.3       | 52.0 ± 12.5       | 0.72 |
| LA Volume (mL)                       | 94.2 ± 27.8       | 84.8 ± 32.2       | 0.26 |
| LA Volume Index (mL/m <sup>2</sup> ) | 40.0 [34.3, 52.2] | 36.6 [30.3, 45.4] | 0.14 |

---

Table represents n (%), median [Q1, Q3] or mean (±SD); PW indicates posterior wall; ERAF, early recurrence of atrial fibrillation; BMI, body mass index; LV, left ventricle; and LA indicates left atrial.

**Supplemental Table III: Summary of Isolation and Reconnection of Left Atrial Pulmonary Veins and Posterior Wall**

| Mapping Post Hybrid Ablation<br>n=64    |             |
|-----------------------------------------|-------------|
| <i>Complete Isolation of PV and PW</i>  | 26 (40.6 %) |
| <i>Reconnected PVs</i>                  | 18 (28.1 %) |
| Gap in Left PVs                         | 10 (15.6 %) |
| Gap in Right PVs                        | 13 (20.3 %) |
| Bilateral PV Gaps                       | 8 (12.5%)   |
| <i>Reconnected PW</i>                   | 38 (59.4%)  |
| Gap in Roof                             | 28 (43.8%)  |
| Gap in Floor                            | 20 (31.3 %) |
| Box (Roof + Floor) Gaps                 | 10 (15.6%)  |
| <b>Final Map Post Hybrid 2 Ablation</b> |             |
| <i>Complete Conduction Block</i>        | 57 (89.1 %) |
| Incomplete PW Isolation                 | 7 (10.9 %)  |

Table represents n (%) for categorical variables and mean (±SD) for continuous variables; PV indicates
